# Supplementary material for: Regulation of the S-Locus Receptor Kinase and Self-Incompatibility in Arabidopsis thaliana
Source: PubMed Central journal article supplement (PMC3564991; doi:10.1534/g3.112.004879), 2013-02-01
Supplement: supp_3.2.315_004879SI.pdf [file supp_3.2.315_004879SI.pdf]

**REGULATION of the S-LOCUS RECEPTOR KINASE and SELF-INCOMPATIBILITY in *ARABIDOPSIS THALIANA***

Susan R. Strickler, Titima Tantikanjana, and June B. Nasrallah

Department of Plant Biology, 412 Mann Library Building, Cornell University, Ithaca, NY 14853, USA

**DOI: [10.1534/g3.112.004879](https://doi.org/10.1534/g3.112.004879)**

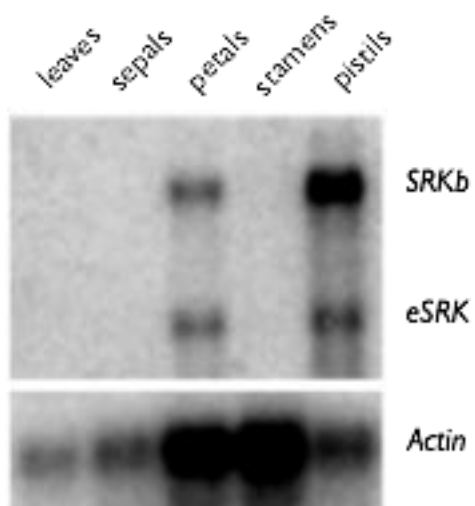

**Figure S1** RNA gel blot analysis of *SRKb* expression in *A. lyrata* tissues. The blot was hybridized first with the *SRKb* probe (upper panel) and subsequently with an actin probe (lower panel).

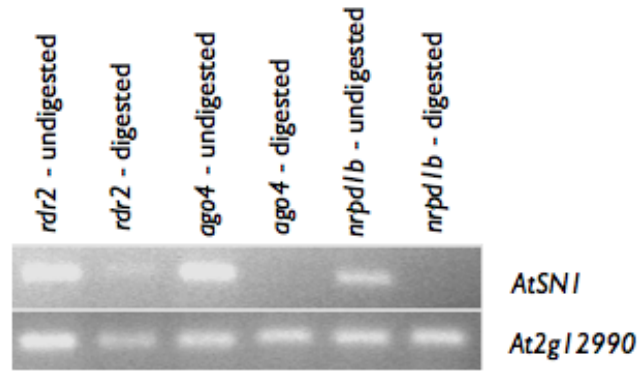

**Figure S2** Loss of genome methylation in *rdr2*, *ago4*, and *nrpd1b* mutants as determined by chop-PCR analysis of the *AtSN1* retroelement.

**Table S1 Primers used for mapping the *sc1* mutation.**

| Primer Name | Chrom | Primer 1 Sequence          | Primer 2 Sequence          |
|-------------|-------|----------------------------|----------------------------|
| NGA63       | 1     | ACCCAAGTGATCGCCACC         | AACCAAGGCACAGAAGCG         |
| CIW12       | 1     | AGGTTTTATTGCTTTTCACA       | CTTTCAAAGCACATCACA         |
| SO392       | 1     | GTTGATCGCAGCTTGATAAGC      | TTTGGAGTTAGACACGGATCTG     |
| T27K12-SP6  | 1     | GGAGGCTATACGAATCTTGACA     | GGACAACGTCTCAAACGGTT       |
| GAPB.2      | 1     | CACTATGTTCAGTGCTGCG        | GATCACTTGCAGCTATGGC        |
| CIW1        | 1     | ACATTTTCTCAATCCTTACTC      | GAGAGCTTCTTTATTTGTGAT      |
| NGA280      | 1     | GGCTCCATAAAAAGTGCACC       | CTGATCTCACGGACAATAGTGC     |
| F8A5a       | 1     | GCAGAGCATAAAGCCATAAACA     | CGTGCATGTTGTTGGAATCT       |
| T13M11b     | 1     | AAGTCCACAAAGGAGGAGAAA      | CCCTTCTAAGCCTAGATTTTGT     |
| F24O1a      | 1     | TGCTACCTGTTGCAACCTCA       | TTTGCTTTCGATGTGAAATGA      |
| F23N19a     | 1     | GGAAGGAGCCTGAGGTAGAGA      | CAGCATTCCCAACTCTTTC        |
| F16P17a     | 1     | TGAGACATTTCTACATTATTTATTTG | AATTACATAAGTTTGATGTTTGTGCT |
| F16P17b     | 1     | CTTTGGCTTGGTCACTAATATGTTCA | TTCAATGCTGGTTCACAGAAA      |
| F16P17c     | 1     | CCTGATGTTGTTTCATTTTCGATTAG | GTGCTCTTGGAAATGGCTTGT      |
| F16M19a     | 1     | TCAGTAATCAGAGAGAGATTTAGGG  | AACTCGCCATTGACACAACA       |
| F9N12c_col  | 1     | GGACATTATGTTGAACCTCGTTT    | TTCAACAACCTTTTGGTAAATAAGA  |
| F9N12c_ler  | 1     | GACATTATGTTGAACCTCGTGA     | TTCAACAACCTTTTGGTAAATAAGA  |
| F9N12b      | 1     | ACTGAGGACAAATGTTTTGTAGC    | TCGAAACAAAGCAGGAGGTT       |
| F2K11b      | 1     | TCCAAATGATGATCCTGCAA       | CCGGCTTATGCAGTAAGAAA       |
| F2K11a      | 1     | TGGTCGTCCTCTCGTTCAG        | CAGATGAGACAATTCAGGGAGA     |
| F24D7a      | 1     | TCACCCAATCTCCCCATAAG       | CGAGCGCCTTACTCTGTGAT       |
| F24D7b      | 1     | AACCAGTTTTCAAATCAAATGAAG   | TGGTGGTGTGAGGTACCAA        |
| T12P18b     | 1     | CGTGCGCAGTTATCTCCTTT       | TTATCACAGTTTTCATTTACCAAAAA |
| T12P18a     | 1     | AGATAAATGCATCAACAAATTGAC   | ACCCACCTCACACTCTCTCC       |
| NGA111      | 1     | TGTTTTTTAGGACAAATGGCG      | CTCCAGTTGGAAGCTAAAGGG      |
| NGA1145     | 2     | GCACATACCCACAACCAGAA       | CCTTCACATCCAAAACCCAC       |
| CIW3        | 2     | GAAACTCAATGAAATCCACTT      | TGAACTTGTGTGAGCTTTGA       |
| NGA1126     | 2     | GCACAGTCCAAGTACAACC        | CGCTACGCTTTTCGGTAAAG       |
| NGA168      | 2     | GAGGACATGTATAGGAGCCTCG     | TCGTCTACTGCACTGCCG         |
| NGA172      | 3     | CATCCGAATGCCATTGTTC        | AGCTGCTTCTTATAGCGTCC       |
| NGA162      | 3     | CTCTGTCACTCTTTTCTCTGG      | CATGCAATTTGCATCTGAGG       |
| CIW11       | 3     | CCCCGAGTTGAGGTATT          | GAAGAAATTCCTAAAGCATT       |
| T27C7-SP6   | 3     | ATGCCTAACTATTGCTGAC        | TTCTGTAGTTCTTTGTGAGTGC     |
| F1P2-TGF    | 3     | TTTGTCTGAAGATGTGGAGAGAGAG  | CAAAACCCCACTTCTTATTATTGT   |
| NGA6        | 3     | ATGGAGAAGCTTACACTGATC      | TGGATTTCTTCTCTCTTCC        |

|         |   |                        |                          |
|---------|---|------------------------|--------------------------|
| CIW5    | 4 | GGTAAAAATTAGGGTTACGA   | AGATTTACGTGGAAGCAAT      |
| NGA8    | 4 | TGGCTTCGTTTATAACATCC   | GAGGGCAAATCTTTATTTCCG    |
| CIW7    | 4 | AATTTGGAGATTAGCTGGAAT  | CCATGTTGATGATAAGCACAA    |
| NGA1107 | 4 | CGACGAATCGACAGAATTAGG  | GCGAAAAAACAAAAAATCCA     |
| CTR1.2  | 5 | CCACTTGTTTCTCTCTAG     | TATCAACAGAAACGCACCGAG    |
| CA72    | 5 | CCCAGTCTAACCACGACCAC   | AATCCCAGTAACCAAACACACA   |
| NGA139  | 5 | GGTTTCGTTTCACTATCCAGG  | AGAGCTACCAGATCCGATGG     |
| ATHPHYC | 5 | CTCAGAGAATTCAGAAAAATCT | AAACTCGAGAGTTTTGTCTAGATC |
| CIW9    | 5 | CAGACGTATCAAATGACAAATG | GACTACTGCTCAAATATTCGG    |
| MTH12   | 5 | GTAAAATTTTCTATTGCA     | ATGTCCTCCTGTTCTGTCCA     |

---

**Table S2 Analysis of a sample of *SRKb*-containing plants derived from the Col-0 *nripd1a-8[SRKb]* x C24 WT[*SRKb-SCRb*] cross.**

| F2 Plant | Pollination Tests <sup>a</sup> |     | <i>nripd1a</i> | <i>SRKb</i> Integration Number <sup>b</sup> | Genomic Methylation <sup>c</sup> |
|----------|--------------------------------|-----|----------------|---------------------------------------------|----------------------------------|
|          |                                |     | homozygote     |                                             |                                  |
| 1-7      | +++                            | +++ | yes            | 1                                           | -                                |
| 1-8      | +++                            | +++ | yes            | 2                                           | -                                |
| 1-9      | 0                              | 0   | yes            | 1                                           | -                                |
| 1-11     | 0                              | 0   | yes            | 2                                           | -                                |
| 2-1      | 0                              | 0   | no             | 2                                           | +                                |
| 2-3      | 0                              | 3   | yes            | 1                                           | -                                |
| 2-4      | 0                              | 0   | no             | 1                                           | +                                |
| 2-6      | 0                              | 0   | yes            | 1                                           | -                                |
| 2-8      | 0                              | 0   | no             | 2                                           | +                                |
| 2-10     | 0                              | 0   | no             | 2                                           | +                                |
| 3-1      | 0                              | 0   | no             | 2                                           | +                                |
| 3-2      | 0                              | 0   | no             | 2                                           | +                                |
| 3-3      | 0                              | 0   | no             | 2                                           | +                                |
| 3-4      | 0                              | 0   | no             | 2                                           | +                                |
| 3-5      | 0                              | 0   | no             | 2                                           | +                                |
| 3-7      | 0                              | 0   | no             | 2                                           | +                                |
| 3-8      | 0                              | 8   | yes            | 1                                           | -                                |
| 3-9      | 0                              | 0   | no             | 2                                           | +                                |
| 3-11     | 3                              | 0   | yes            | 1                                           | -                                |
| 3-12     | +                              | 20  | yes            | 1                                           | -                                |
| 6-3      | +                              | ++  | yes            | 1                                           | -                                |
| 6-4      | 0                              | 0   | no             | 2                                           | +                                |
| 6-5      | 0                              | 0   | no             | 2                                           | +                                |
| 6-6      | 0                              | 0   | no             | 2                                           | +                                |
| 6-7      | 0                              | 0   | no             | 2                                           | +                                |
| 6-8      | 0                              | 0   | no             | 2                                           | +                                |
| 6-10     | 0                              | X   | no             | 2                                           | +                                |
| 6-11     | 0                              | 0   | no             | 1                                           | +                                |

<sup>a</sup> Two replicate pollinations are shown. + indicates 20-50 pollen tubes per pollinated stigma, ++ indicates 50-75 pollen tubes per pollinated stigma, +++ indicates over 75 pollen tubes per pollinated stigma.

<sup>b</sup> The number of *SRKb* transgene integrations

<sup>c</sup> Determined by *AtSN1* methylation

**Table S3 Analysis of plants derived from the Col-0 *nprpd1a-8*[*SRKb*] x Sha WT[*SRKb-SCRb*] cross. All selected plants had the *SRKb* transgene.**

| F2 Plant | Pollination Tests <sup>a</sup> |    | <i>nprpd1a</i> |
|----------|--------------------------------|----|----------------|
|          |                                |    | homozygote     |
| 1-1      | 0                              | 0  | yes            |
| 1-2      | 3                              | 0  | no             |
| 2-1      | 0                              | 2  | no             |
| 2-2      | 0                              | 0  | no             |
| 2-3      | 0                              | 0  | no             |
| 2-4      | 0                              | 0  | no             |
| 2-5      | 0                              | 3  | yes            |
| 2-6      | 0                              | 2  | no             |
| 2-9      | 0                              | 0  | no             |
| 2-10     | 2                              | 0  | no             |
| 2-12     | 0                              | 0  | no             |
| 2-13     | ++                             | +  | yes            |
| 3-1      | 0                              | 0  | yes            |
| 3-2      | 1                              | 1  | yes            |
| 3-5      | 0                              | 0  | no             |
| 3-6      | 0                              | 0  | no             |
| 3-8      | 0                              | 0  | yes            |
| 3-9      | 1                              | 0  | no             |
| 3-11     | 0                              | 0  | yes            |
| 3-12     | 0                              | 0  | no             |
| 4-3      | 0                              | 0  | no             |
| 4-5      | 0                              | 0  | no             |
| 4-7      | 0                              | 0  | no             |
| 4-8      | 25                             | 20 | yes            |
| 4-11     | 0                              | 0  | yes            |
| 4-12     | 0                              | 0  | no             |

<sup>a</sup>Two replicate pollinations are shown. + indicates 20-50 pollen tubes per pollinated stigma, ++ indicates 50-75 pollen tubes per pollinated stigma, +++ indicates over 75 pollen tubes per pollinated stigma.

**Table S4 Preliminary mapping of a putative modifier that segregates in F2 plants derived from the Col-0[*nripd1a-8*] x C24[*SRKb-SCRb*] cross.** All plants listed are *nripd1a-8 SRKb* homozygotes.

| F2 Family | Pollination Tests <sup>a</sup> |     | NGA139 <sup>b</sup> | CIW9 <sup>c</sup> |
|-----------|--------------------------------|-----|---------------------|-------------------|
| 1-7       | +++                            | +++ | H                   | H                 |
| 1-8       | +++                            | +++ | Col                 | Col               |
| 3-12      | +                              | 20  | Col                 | H                 |
| 6-3       | +                              | ++  | Col                 | Col               |
| 1-1       | 0                              | 1   | H                   | H                 |
| 2-3       | 0                              | 3   | C24                 | -                 |
| 2-6       | 0                              | 0   | H                   | H                 |
| 3-11      | 3                              | 0   | H                   | Col               |

<sup>a</sup> + indicates 20-50 pollen tubes observed, ++ indicates 50-75 pollen tubes observed, +++ indicates over 75 pollen tubes

<sup>b</sup> marker located at 8.5 megabases on chromosome 5

<sup>c</sup> marker located at 17.1 megabases on chromosome 5
