# Supplementary material for: Regulation of the S-Locus Receptor Kinase and Self-Incompatibility in Arabidopsis thaliana
Source: PubMed Central journal article supplement (PMC3564991; doi:10.1534/g3.112.004879), 2013-02-01
Supplement: supp_3.2.315_FigureS1.pdf [file supp_3.2.315_FigureS1.pdf]

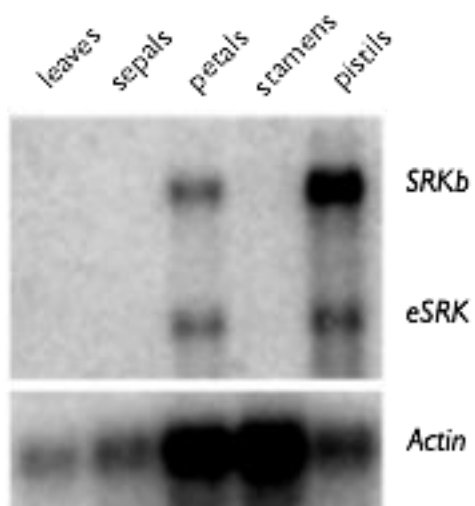

**Figure S1** RNA gel blot analysis of *SRKb* expression in *A. lyrata* tissues. The blot was hybridized first with the *SRKb* probe (upper panel) and subsequently with an actin probe (lower panel).
