# Supplementary material for: Regulation of the S-Locus Receptor Kinase and Self-Incompatibility in Arabidopsis thaliana
Source: PubMed Central journal article supplement (PMC3564991; doi:10.1534/g3.112.004879), 2013-02-01
Supplement: supp_3.2.315_TableS1.pdf [file supp_3.2.315_TableS1.pdf]

**Table S1 Primers used for mapping the *sc1* mutation.**

| Primer Name | Chrom | Primer 1 Sequence          | Primer 2 Sequence          |
|-------------|-------|----------------------------|----------------------------|
| NGA63       | 1     | ACCCAAGTGATCGCCACC         | AACCAAGGCACAGAAGCG         |
| CIW12       | 1     | AGGTTTTATTGCTTTTCACA       | CTTTCAAAGCACATCACA         |
| SO392       | 1     | GTTGATCGCAGCTTGATAAGC      | TTTGGAGTTAGACACGGATCTG     |
| T27K12-SP6  | 1     | GGAGGCTATACGAATCTTGACA     | GGACAACGTCTCAAACGGTT       |
| GAPB.2      | 1     | CACTATGTTCAGTGCTGCG        | GATCACTTGCAGCTATGGC        |
| CIW1        | 1     | ACATTTTCTCAATCCTTACTC      | GAGAGCTTCTTTATTTGTGAT      |
| NGA280      | 1     | GGCTCCATAAAAAGTGCACC       | CTGATCTCACGGACAATAGTGC     |
| F8A5a       | 1     | GCAGAGCATAAAGCCATAAACA     | CGTGCATGTTGTTGGAATCT       |
| T13M11b     | 1     | AAGTCCACAAAGGAGGAGAAA      | CCCTTCTAAGCCTAGATTTTGT     |
| F24O1a      | 1     | TGCTACCTGTTGCAACCTCA       | TTTGCTTTCGATGTGAAATGA      |
| F23N19a     | 1     | GGAAGGAGCCTGAGGTAGAGA      | CAGCATTCCCAACTCTTTC        |
| F16P17a     | 1     | TGAGACATTTCTACATTATTTATTTG | AATTACATAAGTTTGATGTTTGTGCT |
| F16P17b     | 1     | CTTTGGCTTGGTCACTAATATGTTCA | TTCAATGCTGGTTCACAGAAA      |
| F16P17c     | 1     | CCTGATGTTGTTTCATTTTCGATTAG | GTGCTCTTGGAAATGGCTTGT      |
| F16M19a     | 1     | TCAGTAATCAGAGAGAGATTTAGGG  | AACTCGCCATTGACACAACA       |
| F9N12c_col  | 1     | GGACATTATGTTGAACCTCGTTT    | TTCAACAACCTTTTGGTAAATAAGA  |
| F9N12c_ler  | 1     | GACATTATGTTGAACCTCGTGA     | TTCAACAACCTTTTGGTAAATAAGA  |
| F9N12b      | 1     | ACTGAGGACAAATGTTTTGTAGC    | TCGAAACAAAGCAGGAGGTT       |
| F2K11b      | 1     | TCCAAATGATGATCCTGCAA       | CCGGCTTATGCAGTAAGAAA       |
| F2K11a      | 1     | TGGTCGTCCTCTCGTTCAG        | CAGATGAGACAATTCAGGGAGA     |
| F24D7a      | 1     | TCACCCAATCTCCCCATAAG       | CGAGCGCCTTACTCTGTGAT       |
| F24D7b      | 1     | AACCAGTTTTCAAATCAAATGAAG   | TGGTGGTGTGAGGTACCAA        |
| T12P18b     | 1     | CGTGCGCAGTTATCTCCTTT       | TTATCACAGTTTTCATTTACCAAAAA |
| T12P18a     | 1     | AGATAAATGCATCAACAAATTGAC   | ACCCACCTCACACTCTCTCC       |
| NGA111      | 1     | TGTTTTTTAGGACAAATGGCG      | CTCCAGTTGGAAGCTAAAGGG      |
| NGA1145     | 2     | GCACATACCCACAACCAGAA       | CCTTCACATCCAAAACCCAC       |
| CIW3        | 2     | GAAACTCAATGAAATCCACTT      | TGAACTTGTGTGAGCTTTGA       |
| NGA1126     | 2     | GCACAGTCCAAGTACAACC        | CGCTACGCTTTTCGGTAAAG       |
| NGA168      | 2     | GAGGACATGTATAGGAGCCTCG     | TCGTCTACTGCACTGCCG         |
| NGA172      | 3     | CATCCGAATGCCATTGTTT        | AGCTGCTTCTTATAGCGTCC       |
| NGA162      | 3     | CTCTGTCACTCTTTCTCTGG       | CATGCAATTTGCATCTGAGG       |
| CIW11       | 3     | CCCCGAGTTGAGGTATT          | GAAGAAATTCCTAAAGCATT       |
| T27C7-SP6   | 3     | ATGCCTAACTATTGCTGAC        | TTCTGTAGTTCTTTGTGAGTGC     |
| F1P2-TGF    | 3     | TTTGTCTGAAGATGTGGAGAGAGAG  | CAAAACCCCACTTCTTATTGTT     |
| NGA6        | 3     | ATGGAGAAGCTTACACTGATC      | TGGATTTCTTCTCTCTTCC        |

|         |   |                        |                          |
|---------|---|------------------------|--------------------------|
| CIW5    | 4 | GGTTAAAAATTAGGGTTACGA  | AGATTTACGTGGAAGCAAT      |
| NGA8    | 4 | TGGCTTTCGTTTATAAACATCC | GAGGGCAAATCTTTATTTTCGG   |
| CIW7    | 4 | AATTTGGAGATTAGCTGGAAT  | CCATGTTGATGATAAGCACAA    |
| NGA1107 | 4 | CGACGAATCGACAGAATTAGG  | GCGAAAAAACAAAAAATCCA     |
| CTR1.2  | 5 | CCACTTGTTTCTCTCTCTAG   | TATCAACAGAAACGCACCGAG    |
| CA72    | 5 | CCCAGTCTAACCACGACCAC   | AATCCCAGTAACCAAACACACA   |
| NGA139  | 5 | GGTTTCGTTTCACTATCCAGG  | AGAGCTACCAGATCCGATGG     |
| ATHPHYC | 5 | CTCAGAGAATTCAGAAAAATCT | AAACTCGAGAGTTTTGTCTAGATC |
| CIW9    | 5 | CAGACGTATCAAATGACAAATG | GACTACTGCTCAAATATTCGG    |
| MTH12   | 5 | GTAAAATTTTCTATTGCA     | ATGTCCTCCTGTTCTGTCCA     |

---
