# Supplementary material for: Regulation of the S-Locus Receptor Kinase and Self-Incompatibility in Arabidopsis thaliana
Source: PubMed Central journal article supplement (PMC3564991; doi:10.1534/g3.112.004879), 2013-02-01
Supplement: supp_3.2.315_TableS2.pdf [file supp_3.2.315_TableS2.pdf]

**Table S2 Analysis of a sample of *SRKb*-containing plants derived from the Col-0 *nripd1a-8[SRKb]* x C24 WT[*SRKb-SCRb*] cross.**

| F2 Plant | Pollination Tests <sup>a</sup> |     | <i>nripd1a</i> | <i>SRKb</i> Integration Number <sup>b</sup> | Genomic                  |
|----------|--------------------------------|-----|----------------|---------------------------------------------|--------------------------|
|          |                                |     | homozygote     |                                             | Methylation <sup>c</sup> |
| 1-7      | +++                            | +++ | yes            | 1                                           | -                        |
| 1-8      | +++                            | +++ | yes            | 2                                           | -                        |
| 1-9      | 0                              | 0   | yes            | 1                                           | -                        |
| 1-11     | 0                              | 0   | yes            | 2                                           | -                        |
| 2-1      | 0                              | 0   | no             | 2                                           | +                        |
| 2-3      | 0                              | 3   | yes            | 1                                           | -                        |
| 2-4      | 0                              | 0   | no             | 1                                           | +                        |
| 2-6      | 0                              | 0   | yes            | 1                                           | -                        |
| 2-8      | 0                              | 0   | no             | 2                                           | +                        |
| 2-10     | 0                              | 0   | no             | 2                                           | +                        |
| 3-1      | 0                              | 0   | no             | 2                                           | +                        |
| 3-2      | 0                              | 0   | no             | 2                                           | +                        |
| 3-3      | 0                              | 0   | no             | 2                                           | +                        |
| 3-4      | 0                              | 0   | no             | 2                                           | +                        |
| 3-5      | 0                              | 0   | no             | 2                                           | +                        |
| 3-7      | 0                              | 0   | no             | 2                                           | +                        |
| 3-8      | 0                              | 8   | yes            | 1                                           | -                        |
| 3-9      | 0                              | 0   | no             | 2                                           | +                        |
| 3-11     | 3                              | 0   | yes            | 1                                           | -                        |
| 3-12     | +                              | 20  | yes            | 1                                           | -                        |
| 6-3      | +                              | ++  | yes            | 1                                           | -                        |
| 6-4      | 0                              | 0   | no             | 2                                           | +                        |
| 6-5      | 0                              | 0   | no             | 2                                           | +                        |
| 6-6      | 0                              | 0   | no             | 2                                           | +                        |
| 6-7      | 0                              | 0   | no             | 2                                           | +                        |
| 6-8      | 0                              | 0   | no             | 2                                           | +                        |
| 6-10     | 0                              | X   | no             | 2                                           | +                        |
| 6-11     | 0                              | 0   | no             | 1                                           | +                        |

<sup>a</sup> Two replicate pollinations are shown. + indicates 20-50 pollen tubes per pollinated stigma, ++ indicates 50-75 pollen tubes per pollinated stigma, +++ indicates over 75 pollen tubes per pollinated stigma.

<sup>b</sup> The number of *SRKb* transgene integrations

<sup>c</sup> Determined by *AtSN1* methylation
