# Supplementary material for: Regulation of the S-Locus Receptor Kinase and Self-Incompatibility in Arabidopsis thaliana
Source: PubMed Central journal article supplement (PMC3564991; doi:10.1534/g3.112.004879), 2013-02-01
Supplement: supp_3.2.315_TableS3.pdf [file supp_3.2.315_TableS3.pdf]

**Table S3 Analysis of plants derived from the Col-0 *nprpd1a-8*[*SRKb*] x Sha WT[*SRKb-SCRb*] cross. All selected plants had the *SRKb* transgene.**

| F2 Plant | Pollination Tests <sup>a</sup> |    | <i>nprpd1a</i> |
|----------|--------------------------------|----|----------------|
|          |                                |    | homozygote     |
| 1-1      | 0                              | 0  | yes            |
| 1-2      | 3                              | 0  | no             |
| 2-1      | 0                              | 2  | no             |
| 2-2      | 0                              | 0  | no             |
| 2-3      | 0                              | 0  | no             |
| 2-4      | 0                              | 0  | no             |
| 2-5      | 0                              | 3  | yes            |
| 2-6      | 0                              | 2  | no             |
| 2-9      | 0                              | 0  | no             |
| 2-10     | 2                              | 0  | no             |
| 2-12     | 0                              | 0  | no             |
| 2-13     | ++                             | +  | yes            |
| 3-1      | 0                              | 0  | yes            |
| 3-2      | 1                              | 1  | yes            |
| 3-5      | 0                              | 0  | no             |
| 3-6      | 0                              | 0  | no             |
| 3-8      | 0                              | 0  | yes            |
| 3-9      | 1                              | 0  | no             |
| 3-11     | 0                              | 0  | yes            |
| 3-12     | 0                              | 0  | no             |
| 4-3      | 0                              | 0  | no             |
| 4-5      | 0                              | 0  | no             |
| 4-7      | 0                              | 0  | no             |
| 4-8      | 25                             | 20 | yes            |
| 4-11     | 0                              | 0  | yes            |
| 4-12     | 0                              | 0  | no             |

<sup>a</sup>Two replicate pollinations are shown. + indicates 20-50 pollen tubes per pollinated stigma, ++ indicates 50-75 pollen tubes per pollinated stigma, +++ indicates over 75 pollen tubes per pollinated stigma.
