# Supplementary material for: Regulation of the S-Locus Receptor Kinase and Self-Incompatibility in Arabidopsis thaliana
Source: PubMed Central journal article supplement (PMC3564991; doi:10.1534/g3.112.004879), 2013-02-01
Supplement: supp_3.2.315_TableS4.pdf [file supp_3.2.315_TableS4.pdf]

**Table S4 Preliminary mapping of a putative modifier that segregates in F2 plants derived from the Col-0[*nprpd1a-8*] x C24[*SRKb-SCRb*] cross.** All plants listed are *nprpd1a-8 SRKb* homozygotes.

| F2 Family | Pollination Tests <sup>a</sup> |     | NGA139 <sup>b</sup> | CIW9 <sup>c</sup> |
|-----------|--------------------------------|-----|---------------------|-------------------|
| 1-7       | +++                            | +++ | H                   | H                 |
| 1-8       | +++                            | +++ | Col                 | Col               |
| 3-12      | +                              | 20  | Col                 | H                 |
| 6-3       | +                              | ++  | Col                 | Col               |
| 1-1       | 0                              | 1   | H                   | H                 |
| 2-3       | 0                              | 3   | C24                 | -                 |
| 2-6       | 0                              | 0   | H                   | H                 |
| 3-11      | 3                              | 0   | H                   | Col               |

<sup>a</sup> + indicates 20-50 pollen tubes observed, ++ indicates 50-75 pollen tubes observed, +++ indicates over 75 pollen tubes

<sup>b</sup> marker located at 8.5 megabases on chromosome 5

<sup>c</sup> marker located at 17.1 megabases on chromosome 5
